# Supplementary material
Source: PubMed Central journal article supplement (PMC6350908)
Supplement: NIHMS1509276-supplement-2.pdf [file NIHMS1509276-supplement-2.pdf]

**Supplemental Table 1. Demographic and clinical characteristics of patients treated with belinostat and panobinostat with archived tumor tissue available for study.**

| Patient number | Gender | Age | Smoking status | Prior chemotherapy treatment | Sites of disease   | HDAC inhibitor received | Best overall response |
|----------------|--------|-----|----------------|------------------------------|--------------------|-------------------------|-----------------------|
| 1              | M      | 78  | XS (50 py)     | None                         | LN                 | Belinostat              | SD                    |
| 2              | M      | 59  | NS             | Gem Carbo                    | lung               | Belinostat              | SD                    |
| 3              | F      | 76  | NS             | Gem Carbo                    | Pelvic soft tissue | Belinostat              | PD                    |
| 4              | M      | 69  | NS             | GC+Cetux                     | LN                 | Panobinostat            | PR                    |
| 5              | M      | 70  | XS (33 py)     | Gem Carbo                    | LN, bone           | Panobinostat            | SD                    |
| 7              | M      | 78  | NS             | None                         | LN                 | Panobinostat            | SD                    |
| 10             | M      | 56  | NS             | GC;pem                       | LN                 | Belinostat              | CR                    |

PR Partial Response  
 CR Complete response  
 SD Stable Disease  
 PD Progressive Disease  
 NS Non-smoker  
 XS Ex-Smoker  
 GemCarbo Gemcitabine and Carboplatin  
 GC Gemcitabine and Cisplatin  
 Pem Pemetrexed  
 Cetux Cetuximab  
 M Male  
 F Female  
 PY Pack year  
 TMB Tumor Mutational Burden
