# Supplementary material
Source: PubMed Central journal article supplement (PMC6350908)
Supplement: NIHMS1509276-supplement-3.pdf [file NIHMS1509276-supplement-3.pdf]

**Supplemental Table 2.****Individual drug characteristics and doses, maximum plasma levels and protein binding of panobinostat and belinostat in the two phase 1 studies**

| Study                                            | Drug         | Chemical structure | Dose                      | Activity        | Cmax          | Protein binding |
|--------------------------------------------------|--------------|--------------------|---------------------------|-----------------|---------------|-----------------|
| Phase 1 Belinostat Part 1 (Agarwal et al., 2016) | Belinostat   | Hydroxamic acid    | 1000 mg/m <sup>2</sup> IV | Class I,II, IV  | 150±31.6 (uM) | 93-96%          |
| Phase 1 Belinostat (Bailey et al., 2016)         | Belinostat   | Hydroxamic acid    |                           | Class I,II, IV  | 131±31.6 (uM) | 93-96%          |
| Phase 1 Panobinostat Sharma et al., 2015)        | Panobinostat | Hydroxamic acid    | 30 mg orally              | Class I, II, IV | 31 ng/ml*     | 82-88%          |

Cmax= maximum plasma concentration;

\*for normal renal function CrCL ≥ 80 mL/min
