# Supplementary material
Source: PubMed Central journal article supplement (PMC6350908)
Supplement: NIHMS1509276-supplement-4.pdf [file NIHMS1509276-supplement-4.pdf]

**Supplemental Figure 2**

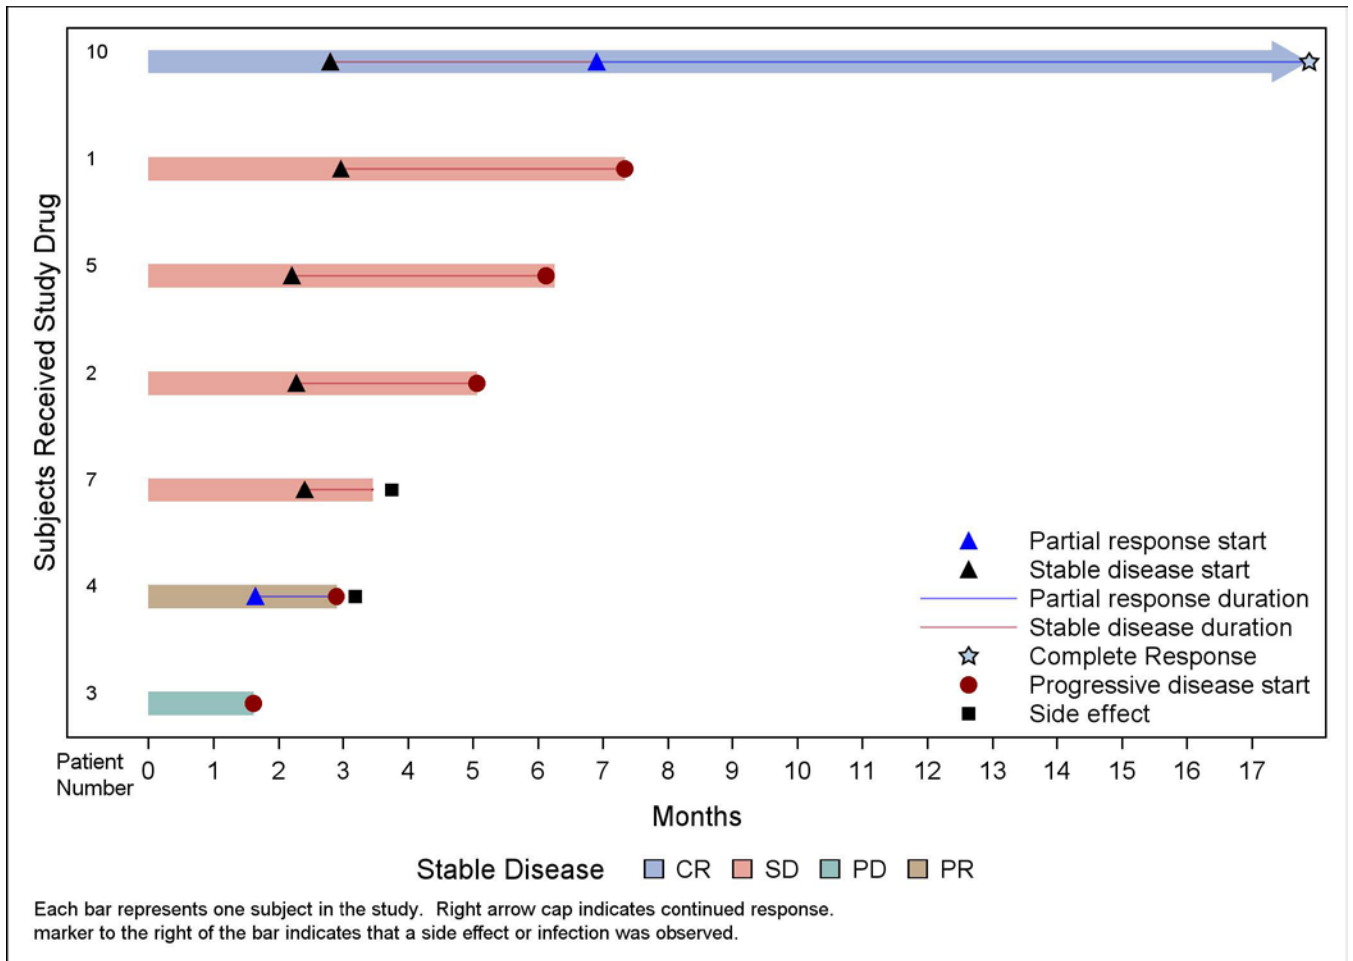

**Swimmer Plot to show the best overall response and duration of benefit in seven bladder cancer patients from Table 1 treated with HDAC inhibition.**
