# Supplementary material
Source: PubMed Central journal article supplement (PMC6350908)
Supplement: NIHMS1509276-supplement-5.pdf [file NIHMS1509276-supplement-5.pdf]

**Supplemental Figure 3**

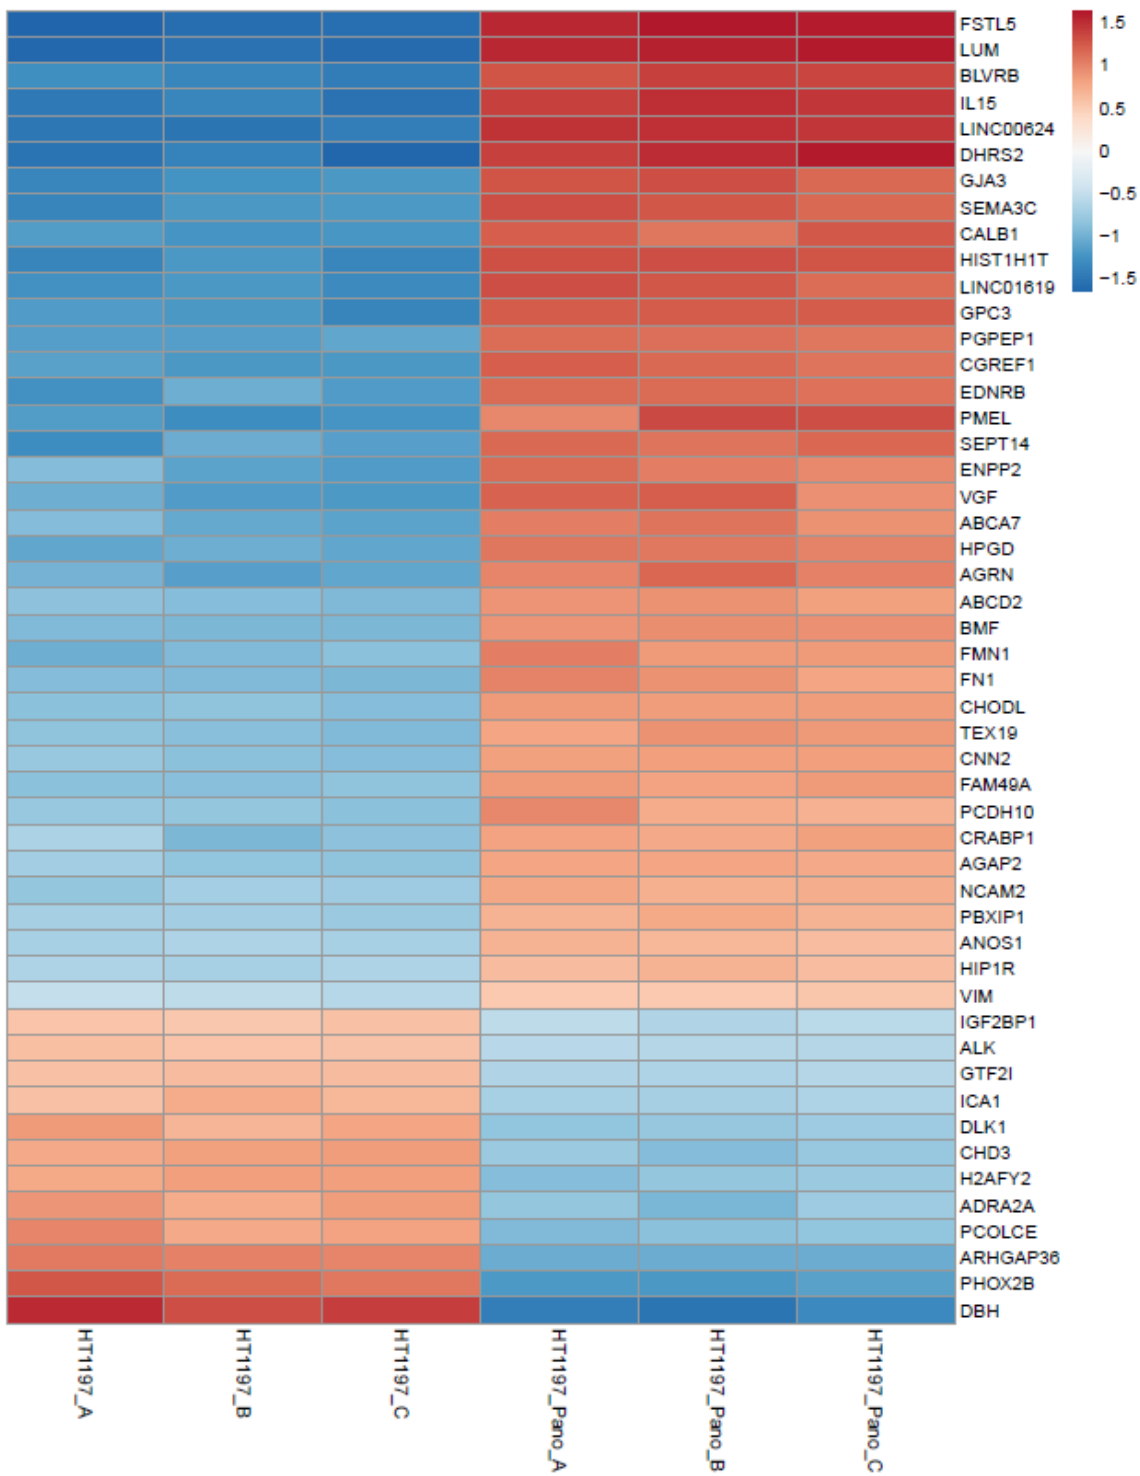

**Heat map of top 50 genes affected in HT1197 cells when treated with panobinostat at 48 hours log2 gene expression change(HT1197 A-B and C represent control replicates, HT1197 Pano A, B, C represent treated replicates). For the cell lines with replicates, statistically significant genes were identified with a FDR of <1% and absolute fold change > 2 fold. Plot was generated with R using median-centered regularized log2 values.**
