# Supplementary material
Source: PubMed Central journal article supplement (PMC6350908)
Supplement: NIHMS1509276-supplement-6.pdf [file NIHMS1509276-supplement-6.pdf]

Supplemental Figure 4

A

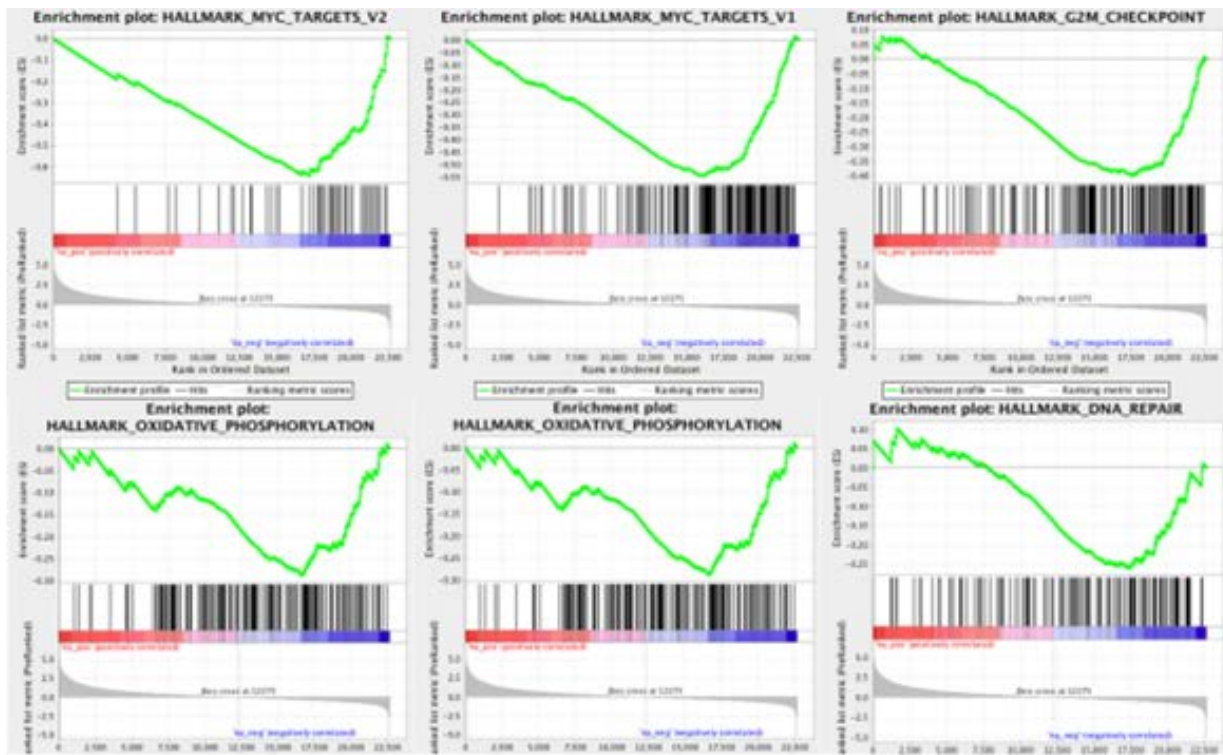

B

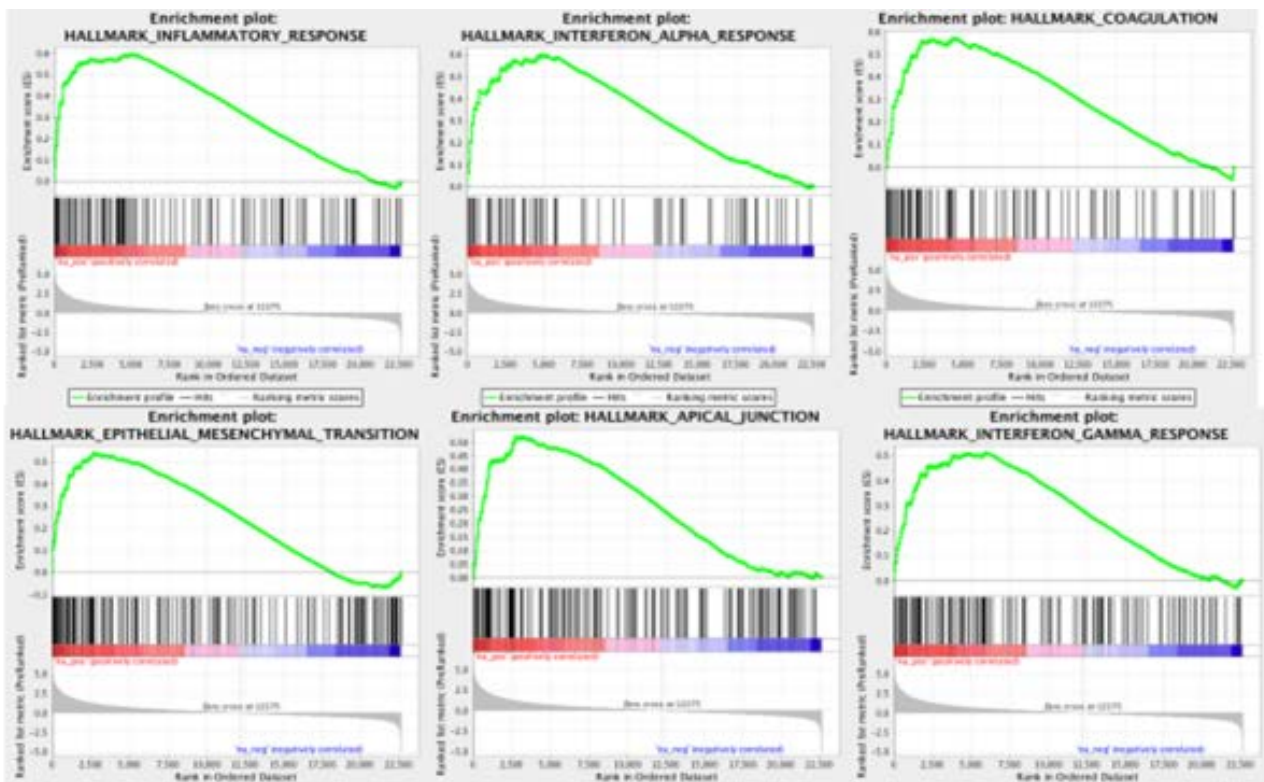

C

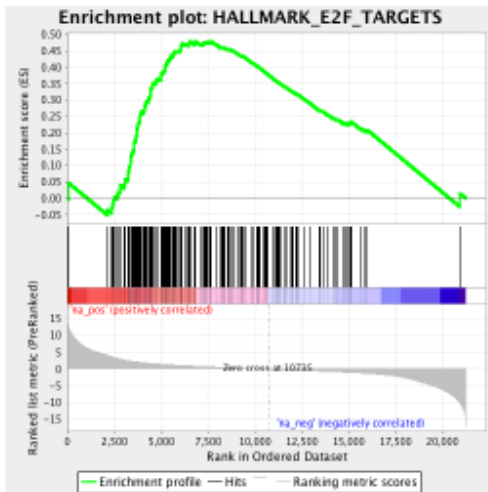

NES 1.80  
P value 0.0  
FDR q value 0.0003

***GSEA with Hallmark gene sets performed on transcriptional changes in HT1197 cells treated with panobinostat for 48 hours. A. Top 6 downregulated GSEA signatures B. Top 6 upregulated GSEA signatures C. GSEA HT1197 vs UMUC3 ( comparison of transcriptome of untreated samples reveals significantly greater presence of the E2F target gene signature in HT1197 cells).***
